# Supplementary material for: Study of the photocatalytic properties of bio-mimicked hollow SnO2microstructures synthesized with Ceiba pentandra (L.) Gaertn. (kapok) as a natural template
Source: Royal Society of Chemistry journal article supplement (doi:10.1039/c5nj01375e), 2015-01-01
Supplement: c5nj01375e1.pdf [file c5nj01375e1.pdf]

## Electronic supplementary information (ESI)

### Study of photocatalytic properties of bio-mimicked hollow SnO<sub>2</sub> microstructures synthesized with *Ceiba pentandra* (L.) Gaertn. (kapok) as a natural template

Young Jin Kim<sup>1a</sup>, Xing Xing<sup>1b</sup>, Do-Young Choi<sup>c</sup>, Cheol-Ho Hwang<sup>d</sup>, Chulmin Choi<sup>e</sup>, Gunwoo Kim<sup>a</sup>, Sungho Jin<sup>ae</sup>, Kyung-Jun Hwang<sup>\*ef</sup>, and Ju-Young Park<sup>\*g</sup>

<sup>a</sup>Materials science and Engineering, University of California at San Diego, La Jolla CA 92093, USA.

<sup>b</sup>Department of Nanoengineering, University of California at San Diego, La Jolla CA 92093, USA.

<sup>c</sup>KHT Engineering Co., Ltd., Gunpo-si 435-833, South Korea.

<sup>d</sup>International Climate and Environment Center, Gwangju 502-861, South Korea.

<sup>e</sup>Mechanical and Aerospace Engineering, University of California at San Diego, La Jolla CA 92093, USA.

<sup>f</sup>Advanced Materials and Strategic Planning Division, Cheorwon-gun 269-802, South Korea.

<sup>g</sup>Green Energy Institute, Mokpo-si 530-400, South Korea.

---

<sup>1</sup>These authors contributed equally to this work.

\*Corresponding author. E-mail address: kyhwang@ucsd.edu and kjhwang@cpri.re.kr (K.-J. Hwang); juyoungpark@gei.re.kr (J.-Y. Park).

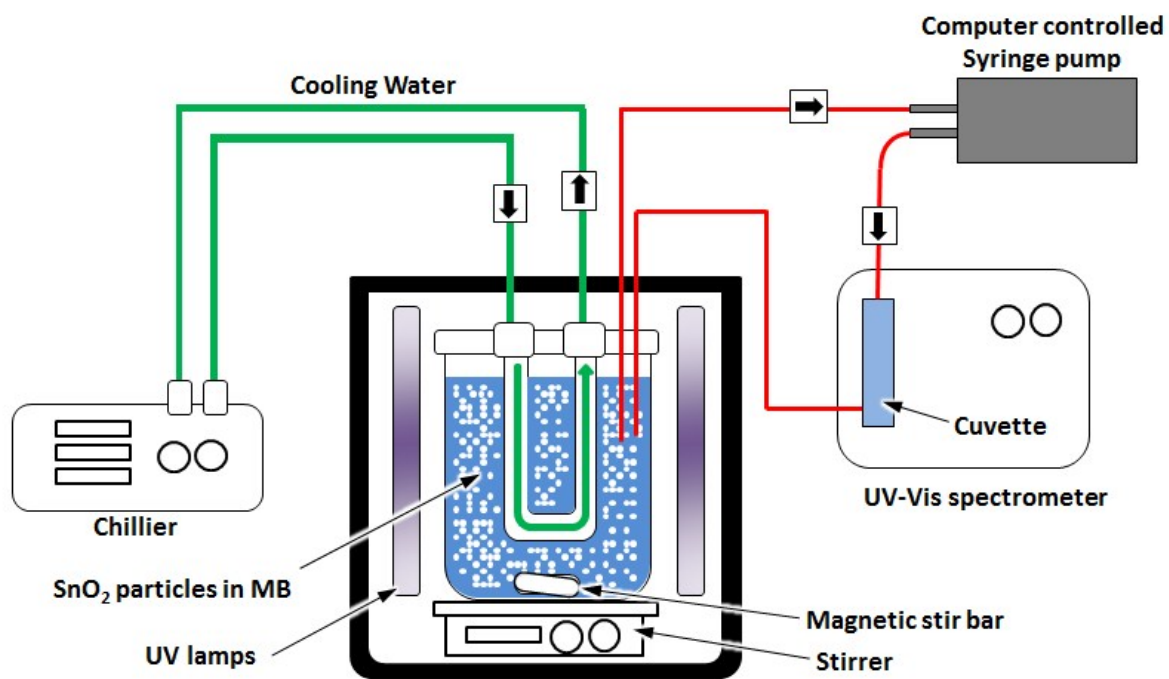

**Fig. S1.** The schematics of the photodegradation apparatus.

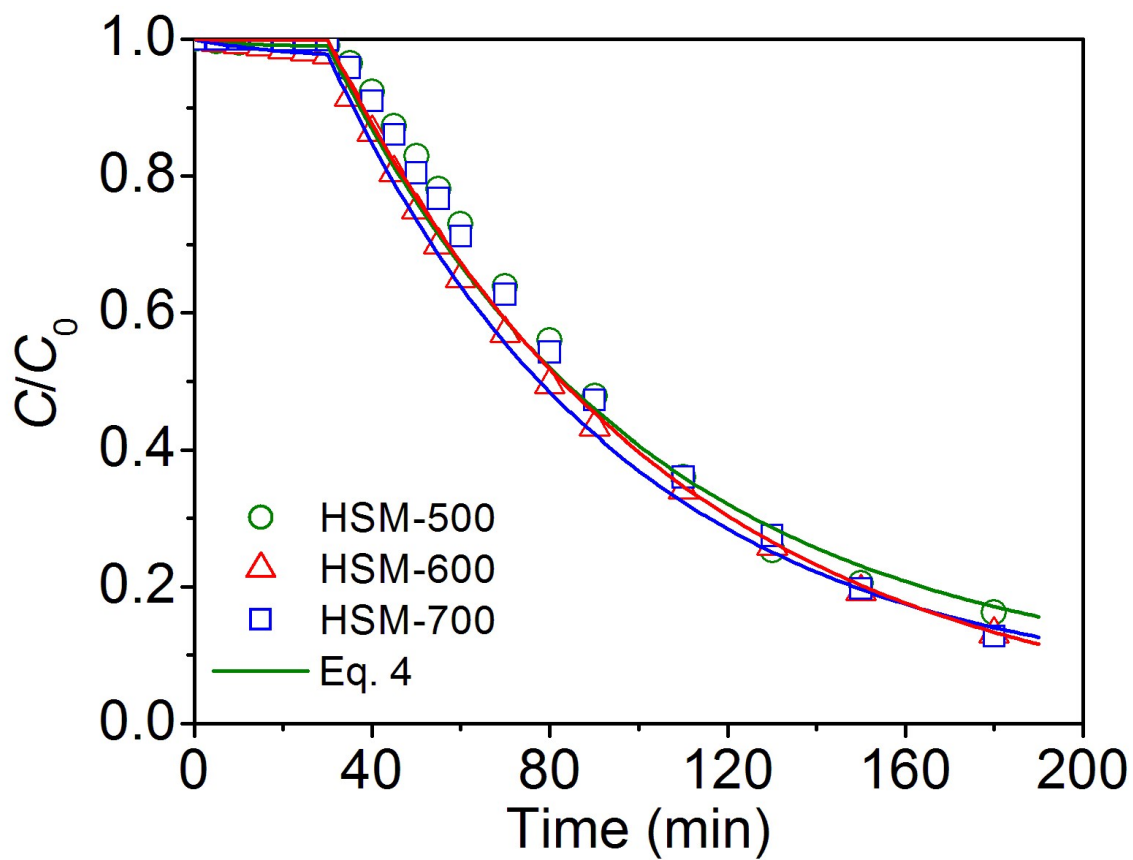

**Fig. S2.** Methylene blue photo-decomposition curves of HSM after calcination at 500, 600 and 700 °C under UV irradiation after adsorption reaction.
